# Supplementary material for: Advantages of Synthetic Noise and Machine Learning for Analyzing Radioecological Data Sets
Source: PLoS One. 2017 Jan 9;12(1):e0170007. doi: 10.1371/journal.pone.0170007 (PMC5222373; doi:10.1371/journal.pone.0170007)
Supplement: S1 Appendix — (XLSX) [file pone.0170007.s001.xlsx]

## Sheet: Sheet1
TotalTaxa	Location	Depth	AvLogRad	pH	Year	R1Location	R2Location	R3Location	R4Location	R5Location	R1Depth	R2Depth	R3Depth	R4Depth	R5Depth	R1AvLogRad	R2AvLogRad	R3AvLogRad	R4AvLogRad	R5AvLogRad	R1pH	R2pH	R3pH	R4pH	R5pH	R1Year	R2Year	R3Year	R4Year	R5Year
0	A	1	5.54811	3.5	87	B	C	B	C	E	9	1	9	1	9	3.80761	2.86541	3.47664	2.86714	5.27162	4.86906	6.24756	6.24675	2.87001	6.84439	89	87	87	87	89
0	A	1	5.54811	3.5	89	C	D	C	C	D	1	9	9	1	9	3.45983	5.18243	2.75876	3.58498	5.89817	4.70296	7.24899	6.44931	3.7587	7.3764	87	89	87	89	87
6	A	9	3.92037	3.3	87	D	D	C	C	C	1	9	9	1	1	3.67276	4.29224	5.76594	4.37865	3.4941	3.47864	4.6162	6.74124	8.20229	2.37232	89	89	89	87	89
10	A	9	3.92037	3.3	89	D	D	D	A	F	1	9	1	1	1	5.15074	4.717	5.71556	3.16207	2.90691	4.24348	2.33962	5.37533	6.13247	7.61213	87	87	89	87	87
0	B	1	5.67725	3.9	87	E	C	C	D	F	9	1	9	1	1	4.05416	3.69366	2.878	7.60842	4.22314	6.73064	5.05002	6.03283	8.61255	6.05193	87	89	89	87	87
0	B	1	5.67725	3.9	89	A	F	B	E	F	1	1	9	9	1	2.26671	4.17426	4.15117	4.51266	5.09268	5.04115	4.22352	5.12196	3.33866	6.4901	87	89	87	89	87
0	B	9	4.32564	3.2	87	E	C	B	C	D	9	1	9	1	1	4.44322	4.21225	4.60946	4.63745	3.53781	4.65339	4.4845	4.28483	7.01537	5.16211	87	89	87	87	87
11	B	9	4.32564	3.2	89	E	B	D	E	F	9	1	1	1	1	5.34431	2.41783	3.81405	4.23894	4.3757	2.68627	4.72662	4.66521	4.98699	3.81848	89	87	87	87	87
6	C	1	5.38021	5.7	87	C	B	F	E	E	9	9	1	1	9	5.0835	4.59029	2.81093	3.99983	3.63758	4.68241	5.80958	6.12414	4.12246	3.87302	87	87	89	89	89
3	C	1	5.38021	5.7	89	F	D	F	C	A	9	9	1	1	1	4.80022	4.93259	6.08118	4.87949	4.14423	6.00211	3.61622	4.8627	5.11358	5.47084	87	87	87	87	89
0	C	9	3.84598	4.3	87	A	F	C	E	E	9	9	1	9	9	3.0522	5.26488	3.00693	4.31675	3.7863	6.39877	5.96448	5.6482	5.15	5.4035	89	89	89	89	89
8	C	9	3.84598	4.3	89	C	E	E	B	E	1	1	1	1	1	5.02537	1.70886	3.98363	4.70775	4.38885	4.03651	7.0401	5.15284	3.65833	6.29222	87	87	87	89	87
0	D	1	4.89444	4.8	87	A	C	A	B	B	9	1	9	1	9	4.77591	3.38367	5.15382	4.91383	4.6425	2.50183	3.92877	5.52091	5.88604	4.97513	89	87	87	89	89
0	D	1	4.89444	4.8	89	E	A	E	E	C	1	9	9	1	9	3.52352	3.88494	3.99215	2.57875	2.67997	7.59953	4.83172	5.32016	7.4109	3.58025	87	89	89	89	87
0	D	9	3.35014	4.3	87	C	A	F	D	E	1	1	9	1	9	5.25986	3.86364	3.66185	4.30884	5.05528	4.75157	5.07016	4.28413	5.31531	7.45723	87	87	87	87	89
0	D	9	3.35014	4.3	89	E	D	F	D	B	1	9	1	1	9	4.85677	3.29471	3.00553	5.09493	3.97985	4.25725	2.9915	5.93301	3.53831	5.96792	89	89	89	89	87
9	E	1	3.53741	6.1	87	E	B	B	F	C	1	1	9	9	9	5.01734	4.57293	3.43191	5.82418	5.58407	5.45944	3.01124	4.2234	5.32708	5.78168	89	89	89	89	89
7	E	1	3.53741	6.1	89	D	E	E	D	D	9	1	1	9	1	2.98539	3.72091	4.09645	5.23533	3.41704	5.98813	3.57921	5.67001	5.92358	5.88446	87	87	89	89	87
3	E	9	3.53741	7	87	D	B	D	A	A	1	1	9	1	9	3.78896	4.05147	4.70678	4.28718	3.90125	7.46008	3.45469	5.28862	5.38879	6.30754	89	89	89	87	87
3	E	9	3.53741	7	89	E	C	C	C	C	1	9	9	1	9	4.48619	5.52146	3.79482	3.05707	3.72892	3.60643	3.92491	5.67612	5.01364	2.77002	89	87	87	89	87
11	F	1	2.59049	6.2	87	C	F	D	C	E	1	9	9	1	1	2.97963	2.84704	3.16066	3.14395	4.76842	6.18011	7.52768	2.34157	4.13158	6.52783	87	87	89	89	87
4	F	1	2.59049	6.2	89	C	A	C	B	D	1	1	9	1	1	4.19066	3.31898	5.23134	2.37153	4.91043	5.97261	4.10221	6.2264	5.97109	4.38669	87	89	87	89	87
0	F	9	4.3787	7.1	87	F	F	A	F	E	1	1	9	1	1	3.75141	4.24562	4.95079	5.39148	4.0844	2.79448	3.99542	4.74221	6.1151	5.60323	87	87	89	87	87
6	F	9	4.3787	7.1	89	B	B	E	A	C	1	9	1	9	1	4.23161	4.86224	4.78563	5.725	3.81556	2.89446	5.00812	6.6945	4.85843	4.14116	87	87	89	89	89
