# Supplementary material for: Advantages of Synthetic Noise and Machine Learning for Analyzing Radioecological Data Sets
Source: PLoS One. 2017 Jan 9;12(1):e0170007. doi: 10.1371/journal.pone.0170007 (PMC5222373; doi:10.1371/journal.pone.0170007)
Supplement: S2 Appendix — (XLSX) [file pone.0170007.s002.xlsx]

## Sheet: Sheet1
logCFU	depth	water	pH	logCond	logCs	logTc	logCr	logNO3	logNO2	R1depth	R2depth	R3depth	R4depth	R5depth	R1water	R2water	R3water	R4water	R5water	R1pH	R2pH	R3pH	R4pH	R5pH	R1logCond	R2logCond	R3logCond	R4logCond	R5logCond	R1logCs	R2logCs	R3logCs	R4logCs	R5logCs	R1logTc	R2logTc	R3logTc	R4logTc	R5logTc	R1logCr	R2logCr	R3logCr	R4logCr	R5logCr	R1logNO3	R2logNO3	R3logNO3	R4logNO3	R5logNO3
4	16.6	4.3	9.2	-0.39794	3.48572	5.8	-1.69897	0.845098	-1.30103	27.1333	19.949	31.1353	38.7221	38.1479	17.5327	7.81395	15.1541	9.65042	21.1335	9.26704	8.28798	7.3013	7.80696	8.37529	0.0768714	1.81886	0.782169	0.401401	1.28792	1.23016	1.15229	-3.37807	-1.27087	5.23758	4.58719	7.82556	5.63889	9.34646	-0.314067	-1.44554	-0.0146685	1.40203	-0.385329	-4.21288	4.55327	4.86265	5.51797	2.30355	-0.919111
-2	20.5	2.8	9.6	-0.154902	4.29003	5.3	-0.00877392	1.46389	-0.39794	42.0785	13.2906	27.6188	37.3884	21.3528	0	14.2763	6.66137	0	7.67626	7.8489	8.18738	7.72626	8.85481	6.6668	1.68979	1.16875	1.15801	1.56029	2.31439	4.17098	4.12763	-0.495861	0.870971	2.89917	5.6615	0.982187	7.37697	6.36767	-0.551964	-1.61728	1.04545	4.51331	0.500448	1.53014	1.68042	1.95475	-2.38017	2.29911	-0.428471
3.7	21.8	2.8	9.5	-0.236572	3.13988	4.95	-0.0655015	1.37107	-0.522879	24.267	16.9153	15.7652	22.1544	23.6547	13.2884	8.13272	18.5243	11.2833	10.2206	8.44662	8.96121	7.36621	9.38127	8.34524	1.92715	-0.705984	0.733603	0.744289	0.17829	-4.16672	2.66261	2.83262	3.2121	3.4184	3.86924	8.80366	1.12986	2.34833	6.23094	-1.40782	2.45805	6.40633	-1.08915	3.29323	0.401693	2.31324	2.55458	4.00215	2.10431
-2	23.1	4.7	9.8	-0.0555173	3.81425	5.4	0.561101	1.96755	-0.522879	13.7732	25.1658	26.3703	30.3312	26.6536	5.85391	7.87311	3.91197	2.0328	10.3459	6.76673	9.30608	8.84066	8.03933	7.48182	2.13992	0.866365	0.26671	-0.549384	1.47704	1.33864	2.74391	4.24795	-3.40959	1.38017	7.81182	3.57547	11.0017	3.03314	5.60485	-5.44164	-1.05398	2.85147	0.722073	3.27836	4.39197	-0.273971	5.30907	4.03248	5.60915
-2	24.4	3.7	8	1.22298	4.72509	6	2.68469	4.06967	-1.30103	26.9366	26.6187	39.2084	28.7132	27.9717	16.8168	15.9986	13.1961	8.75268	6.02883	8.11068	8.96574	6.64414	9.10207	8.73773	-0.725529	0.897435	0.323527	-0.469671	0.385356	0.326817	2.18918	1.89155	0.931999	-1.98002	11.1978	3.67742	5.53756	7.99923	2.31249	-2.06561	0.566727	2.03642	0.150432	1.78383	2.29689	-1.43094	6.62935	2.5225	6.86641
3.2	25.6	6.2	9.6	1.73735	4.33041	7	2.49098	4.66876	-1.30103	25.5679	43.8358	35.7027	46.8011	24.5264	14.8649	9.76857	14.7468	7.27752	11.9681	7.33875	8.44899	9.00491	8.71352	8.79567	1.292	0.908136	1.06467	1.02449	0.790196	2.56691	1.55739	-0.713046	-1.11486	0.656931	5.74402	5.03797	13.4218	6.11618	1.28524	1.65017	-0.104683	0.981776	-1.53803	-0.149094	4.9834	0.498545	0.791478	1.66397	1.32225
-2	26.9	6	7.9	1.69028	2.74429	7.4	2.91895	4.5989	1.94201	41.5517	17.4889	33.3013	35.9711	43.444	0.0019763	12.6113	2.3705	5.45814	16.8688	8.67495	9.17752	6.8484	8.9755	8.82507	0.662359	0.755281	1.15196	1.32663	0.828106	3.86512	2.00276	4.53946	-3.57566	-2.03148	4.12233	5.38344	6.85977	11.8996	5.05538	2.31996	-3.28726	1.37349	2.77151	0.0390886	0.579355	4.15126	2.44143	-0.414382	5.76204
2.6	28.2	2.4	7.9	1.50188	-0.769551	8	2.7098	4.35889	1.75664	28.7188	25.4901	34.3023	26.5373	34.9084	2.09967	2.5245	6.71166	16.2479	15.0474	8.60815	8.13101	10.1964	8.28904	7.82383	0.315264	0.921377	1.59704	2.71242	0.352477	1.64421	1.22156	-2.97314	1.93938	1.64421	4.949	4.83863	6.36516	2.58216	10.2314	-2.47314	3.53789	0.265292	1.13224	2.35183	3.76194	-3.52991	4.12276	2.55317	4.21801
-2	29.5	1.9	8.2	1.40756	-0.346787	8.1	2.60002	4.27852	1.77085	18.7252	23.1128	18.1565	26.6729	29.1013	13.8699	5.67503	2.77395	5.7782	14.3431	8.6066	9.15505	8.21063	8.19146	9.47968	1.44536	1.15027	0.542459	3.03467	0.764275	2.74201	-0.870855	1.07558	-1.67508	4.98002	9.31219	1.67679	4.94567	0.640809	2.40624	2.52322	3.34905	-3.13586	0.128827	-0.878562	-1.22569	0.124464	-0.660986	1.12604	0.775126
-2	30.8	3.2	8.4	1.14395	-0.0409586	7.95	-0.0457575	3.97864	0.69897	29.5467	26.968	45.4696	16.5328	23.9269	11.3024	7.23003	10.6045	24.5149	13.5104	9.78425	9.45447	7.62578	7.65562	7.78976	0.836595	1.28897	1.00573	1.84995	1.23563	-3.701	5.28006	5.57221	-3.56526	-3.28611	2.44369	1.83189	2.85534	1.22552	7.69495	3.73267	1.35018	-0.84087	2.55259	-2.36452	-1.62926	3.16458	3.19968	4.90706	5.28701
2.7	32	21.4	8	0.372912	-0.468521	6.4	-0.537602	3.18469	-0.30103	10.3948	39.9804	19.9337	24.5362	34.9092	8.88903	6.18749	10.6214	5.84163	11.4939	7.56007	9.32243	9.4324	8.17545	9.2353	0.881294	0.727371	0.56372	1.4976	0.676085	2.2303	1.56171	-0.728618	3.66922	0.651971	7.17438	1.22612	6.17225	5.32385	7.7213	0.0829263	1.52394	1.46271	1.03588	-1.54037	6.22958	5.15978	0.284545	5.12493	0.57475
-2	34.5	7.6	8	1.47392	-0.283997	8	2.63443	4.34635	1.86034	32.7703	35.7684	33.7187	19.2569	21.1393	8.92045	1.66817	19.4115	17.5717	0.626836	9.44288	7.93052	9.33231	9.44995	9.3244	-0.452327	1.9387	0.519182	0.633433	1.76303	3.24357	-3.30514	0.0256182	-1.01057	1.04855	3.82553	2.43139	0.380409	0.47267	9.55085	1.46197	5.51393	1.26573	0.0337269	2.17196	1.40818	-2.02075	5.0303	-0.327091	1.80219
-2	37	12	7.8	1.48058	-0.0757207	7.9	2.47397	4.33244	1.66558	34.4409	31.7114	22.4322	27.569	30.3068	9.1657	16.8966	14.4178	11.1223	3.42039	8.37068	8.20732	8.44136	7.61293	9.23031	0.52494	0.236851	-0.45827	1.05255	2.72586	-0.545237	3.28596	-2.02902	-2.65125	0.495262	2.81767	1.73982	6.14283	10.8044	9.4337	0.650161	0.392024	0.0174486	0.431455	-0.143792	-0.104441	3.81627	6.29579	0.172145	3.13694
-2	39.5	17.4	7.5	1.60217	-0.229148	7.92	2.52699	4.53908	1.53656	33.4398	30.3596	22.6444	43.1936	32.9209	0	11.5074	13.5119	12.4994	5.28231	8.7617	7.63737	9.80102	6.4067	7.54689	0.135738	0.69703	2.27674	0.483805	1.23749	-1.1823	-0.10655	-4.20183	5.45754	1.62395	7.02601	9.56821	10.1332	9.88509	9.438	1.13435	2.55751	-3.59326	2.31783	-2.50756	8.10539	-1.55243	-0.35316	-0.599841	4.90824
3.3	41.9	7.5	7.2	0.763428	-2	7.35	-0.958607	3.62221	0.69897	29.871	35.4393	35.6758	24.6615	22.5545	7.92869	12.9842	0	8.37829	15.1714	6.90996	9.54615	9.08448	7.5899	7.44431	0.731748	-0.468514	0.881979	1.24889	0.519457	-0.252305	-0.874563	3.20897	5.18024	2.6293	1.03019	5.68628	6.17886	0.821867	4.49649	1.99993	2.42979	4.42337	1.04598	1.48372	2.9431	-4.55741	2.8864	7.60141	5.17949
4.3	43.9	19.7	7.2	0.572872	-0.744727	6.4	-1.04576	3.3784	-0.30103	37.5072	20.5113	17.8821	34.5682	34.0323	7.33357	5.1024	0	5.68647	9.07903	9.39332	7.99286	9.33688	8.4222	8.56374	0.96531	1.7072	0.53685	0.868942	0.634506	2.51851	-4.14305	0.551229	1.00598	3.09484	5.99068	6.32854	6.46768	5.50513	5.8615	-1.23178	1.53635	-0.774226	-1.95075	-1.34238	1.96426	5.36592	3.66925	2.40787	4.74065
2.4	25	4.7	9.6	1.73735	-4	-4	-4	-4	-4	45.5518	39.9516	38.9237	30.1703	29.3543	0	8.1871	17.7734	4.2596	14.704	7.96894	10.6474	8.90593	7.84556	8.96266	1.19271	0.468387	0.78434	1.126	0.602744	-0.621773	-1.25859	2.08384	1.96356	5.42668	1.85945	9.73519	12.3114	1.59632	10.1963	2.62441	2.47607	1.22873	-0.847804	0.381188	4.49205	5.61225	2.15079	4.02924	4.1742
5.5	27	9	7.9	1.69028	-4	-4	-4	-4	-4	32.6747	29.1525	21.5881	16.2952	35.4282	13.1954	12.63	14.0824	0	14.0546	9.30846	8.99733	7.00492	8.44498	8.30424	0.49957	1.22251	0.865048	2.01678	0.418688	3.9196	3.25975	-1.00623	0.668092	2.2575	6.75735	5.8495	6.33769	8.39426	7.3221	2.29736	0.706792	-0.907101	1.35491	4.48999	3.23798	1.37535	1.28525	5.66898	-3.39475
[truncated: 5 more columns]
